# Supplementary material for: The crosstalk between AXL and YAP promotes tumor progression through STAT3 activation in head and neck squamous cell carcinoma
Source: PubMed Central journal article supplement — Cancer Sci. 2020 Jul 16;111(9):3222–35. doi: 10.1111/cas.14546 (PMC7469783; doi:10.1111/cas.14546), 2020-07-16
Supplement: CAS-111-3222-s003.pdf [file CAS-111-3222-s003.pdf]

| gene_Name | Gene_ID         | group_1     | group_2     | log2FoldChange | pvalue     | padj       |
|-----------|-----------------|-------------|-------------|----------------|------------|------------|
| TEX261    | ENSG00000144043 | 1131.03834  | 235.0041261 | -1.8374        | 1.86E-22   | 2.58E-18   |
| YAP1      | ENSG00000137693 | 3917.143594 | 833.5815273 | -1.8137        | 4.63E-22   | 3.21E-18   |
| PDE1C     | ENSG00000154678 | 224.3437331 | 42.78414769 | -1.4682        | 3.21E-10   | 2.34E-07   |
| ISCA2     | ENSG00000165898 | 435.4686664 | 118.0462211 | -1.4259        | 4.55E-12   | 6.54E-09   |
| SLC39A6   | ENSG00000141424 | 1720.309195 | 569.5637194 | -1.3637        | 8.88E-16   | 2.05E-12   |
| CPA4      | ENSG00000128510 | 173.0864007 | 34.64665764 | -1.247         | 2.01E-07   | 6.48E-05   |
| TNFRSF12A | ENSG00000006327 | 7355.358645 | 2836.913323 | -1.2187        | 1.58E-15   | 3.12E-12   |
| SAE1      | ENSG00000142230 | 2553.166548 | 972.6740833 | -1.1853        | 4.72E-12   | 6.54E-09   |
| KIAA0101  | ENSG00000166803 | 333.469412  | 101.5179181 | -1.1359        | 5.89E-07   | 0.00016005 |
| DNPEP     | ENSG00000123992 | 1077.00821  | 420.9856277 | -1.1356        | 1.63E-10   | 1.51E-07   |
| VGLL1     | ENSG00000102243 | 227.7064004 | 71.54325239 | -1.1284        | 5.29E-07   | 0.00014651 |
| FAM89A    | ENSG00000182118 | 234.2878968 | 81.25227629 | -1.1142        | 1.89E-07   | 6.22E-05   |
| FAM46B    | ENSG00000158246 | 353.6579192 | 131.1785195 | -1.0925        | 9.39E-08   | 3.52E-05   |
| FAM96B    | ENSG00000166595 | 1652.059927 | 647.2309298 | -1.091         | 9.84E-09   | 4.55E-06   |
| PRSS23    | ENSG00000150687 | 5018.787304 | 2145.378333 | -1.0683        | 3.73E-11   | 4.20E-08   |
| CCNA2     | ENSG00000145386 | 1045.212896 | 391.4368799 | -1.0664        | 2.87E-07   | 8.46E-05   |
| METTL9    | ENSG00000197006 | 1328.580214 | 563.3696024 | -1.0439        | 2.58E-09   | 1.43E-06   |
| SLC35F2   | ENSG00000110660 | 1941.620824 | 823.3901256 | -1.0427        | 2.90E-09   | 1.55E-06   |
| BICC1     | ENSG00000122870 | 169.9989815 | 53.77206913 | -1.0305        | 1.02E-05   | 0.0020193  |
| RAB23     | ENSG00000112210 | 379.5681507 | 153.8850023 | -1.0263        | 1.84E-07   | 6.21E-05   |
| YIPF6     | ENSG00000181704 | 1697.503987 | 739.7609967 | -1.0134        | 5.98E-09   | 2.98E-06   |
| MARCHF4   | ENSG00000144583 | 57.13318176 | 11.12491349 | -0.98914       | 3.65E-05   | 0.0054727  |
| SEPN1     | ENSG00000162430 | 1916.83692  | 832.8534608 | -0.98276       | 1.34E-07   | 4.75E-05   |
| ICMT      | ENSG00000116237 | 3151.98014  | 1402.2422   | -0.97005       | 8.49E-08   | 3.27E-05   |
| ULBP3     | ENSG00000131019 | 106.1179367 | 37.83130184 | -0.94113       | 4.98E-05   | 0.0068301  |
| F2RL1     | ENSG00000164251 | 513.990947  | 239.0373856 | -0.92152       | 2.67E-07   | 8.23E-05   |
| DTD2      | ENSG00000129480 | 281.0664485 | 121.3148984 | -0.9056        | 1.48E-05   | 0.0027362  |
| DCK       | ENSG00000156136 | 465.6687133 | 216.0932512 | -0.90473       | 1.24E-06   | 0.00030772 |
| ASNA1     | ENSG00000198356 | 5224.625343 | 2481.801997 | -0.90043       | 3.91E-07   | 0.00011069 |
| PDCD1LG2  | ENSG00000197646 | 162.1755175 | 60.07039352 | -0.89789       | 0.00011475 | 0.012621   |
| MRPL55    | ENSG00000162910 | 495.880443  | 234.3097857 | -0.88282       | 2.34E-06   | 0.00055947 |
| PDCD7     | ENSG00000090470 | 509.576352  | 244.7332583 | -0.88194       | 9.12E-07   | 0.00023853 |
| TMED2     | ENSG00000086598 | 7515.226806 | 3689.869938 | -0.88023       | 1.75E-07   | 6.05E-05   |
| F3        | ENSG00000117525 | 19032.65441 | 7949.924356 | -0.87254       | 8.66E-05   | 0.0098419  |
| ARSB      | ENSG00000113273 | 244.1510045 | 107.7232622 | -0.84739       | 9.38E-05   | 0.010479   |
| E2F5      | ENSG00000133740 | 365.3556824 | 175.62357   | -0.84682       | 1.07E-05   | 0.0020909  |
| ANKRD34A  | ENSG00000181039 | 112.9806895 | 45.86163891 | -0.83886       | 0.00026929 | 0.025386   |
| RHOD      | ENSG00000173156 | 4402.330964 | 2182.866702 | -0.83874       | 3.90E-06   | 0.00083129 |
| GJC1      | ENSG00000182963 | 1102.055325 | 550.8328767 | -0.83818       | 2.45E-06   | 0.00056518 |
| S1PR1     | ENSG00000170989 | 198.7642281 | 76.65725007 | -0.83675       | 0.00037158 | 0.032184   |
| DDAH1     | ENSG00000153904 | 1167.635211 | 592.4272839 | -0.83508       | 9.99E-07   | 0.00025643 |
| KBTBD8    | ENSG00000163376 | 417.2879815 | 177.6910143 | -0.83249       | 0.00022258 | 0.021876   |
| GTF3C6    | ENSG00000155115 | 652.9937884 | 303.6582149 | -0.83226       | 6.13E-05   | 0.0077921  |
| PARP3     | ENSG00000041880 | 242.3854818 | 115.680906  | -0.83181       | 3.19E-05   | 0.0050238  |
| CDH2      | ENSG00000170558 | 204.5643715 | 86.98233813 | -0.83144       | 0.00022826 | 0.022277   |
| MRPS17    | ENSG00000239789 | 192.0089813 | 89.7618385  | -0.829         | 6.04E-05   | 0.0077921  |
| ENY2      | ENSG00000120533 | 768.6724767 | 387.8852808 | -0.82867       | 2.75E-06   | 0.00061577 |
| GLIPR1    | ENSG00000139278 | 600.5427089 | 288.2328688 | -0.82826       | 3.10E-05   | 0.0049456  |
| TMEM64    | ENSG00000180694 | 553.2722763 | 279.3617321 | -0.82825       | 2.72E-06   | 0.00061577 |
| GPR157    | ENSG00000180758 | 774.2571235 | 375.2286386 | -0.8241        | 2.88E-05   | 0.0046948  |
| ASB13     | ENSG00000196372 | 686.1704901 | 320.3110124 | -0.82207       | 8.59E-05   | 0.0098344  |
| EPS15L1   | ENSG00000127527 | 1658.464852 | 864.8407722 | -0.82028       | 3.20E-07   | 9.24E-05   |
| CMTM4     | ENSG00000183723 | 3016.482909 | 1576.59166  | -0.81934       | 2.75E-07   | 8.28E-05   |
| NACC2     | ENSG00000148411 | 1872.581177 | 920.0589203 | -0.81864       | 2.30E-05   | 0.0039277  |
| TRNP1     | ENSG00000253368 | 1488.72135  | 720.7557441 | -0.81412       | 4.89E-05   | 0.0068301  |

|           |                 |             |             |          |            |            |
|-----------|-----------------|-------------|-------------|----------|------------|------------|
| LIPA      | ENSG00000107798 | 2677.870961 | 1287.312656 | -0.80871 | 7.55E-05   | 0.008947   |
| LINC00984 | ENSG00000259330 | 299.3083209 | 150.0197574 | -0.80351 | 2.49E-05   | 0.0041683  |
| NAPRT1    | ENSG00000147813 | 1520.529358 | 796.0642946 | -0.79729 | 2.91E-06   | 0.00063949 |
| IL31RA    | ENSG00000164509 | 95.58647679 | 39.8974685  | -0.79046 | 0.00067721 | 0.049135   |
| OSBP2     | ENSG00000184792 | 917.3871031 | 467.9758323 | -0.77913 | 4.90E-05   | 0.0068301  |
| FOSL1     | ENSG00000175592 | 8069.442905 | 4047.48599  | -0.75258 | 0.00027835 | 0.026063   |
| PMF1      | ENSG00000160783 | 227.4960874 | 115.3536477 | -0.74087 | 0.00035143 | 0.031219   |
| KCTD12    | ENSG00000178695 | 215.352653  | 106.6270033 | -0.73489 | 0.00062591 | 0.046634   |
| ACP2      | ENSG00000134575 | 474.2539299 | 242.870681  | -0.73166 | 0.00039438 | 0.032839   |
| RNF185    | ENSG00000138942 | 1049.683721 | 579.4732579 | -0.73075 | 1.98E-05   | 0.0034325  |
| ENDOD1    | ENSG00000149218 | 984.9203538 | 525.8794679 | -0.71726 | 0.00024699 | 0.023769   |
| SPG21     | ENSG00000090487 | 1557.616996 | 870.1418787 | -0.71553 | 3.00E-05   | 0.0048407  |
| AXL       | ENSG00000167601 | 5713.204873 | 3223.432071 | -0.71301 | 1.66E-05   | 0.0030291  |
| CASC3     | ENSG00000108349 | 2334.297233 | 1333.340898 | -0.71156 | 5.35E-06   | 0.0011224  |
| KIAA0040  | ENSG00000235750 | 1086.235333 | 593.0553752 | -0.70691 | 0.00019082 | 0.019302   |
| SMPD4     | ENSG00000136699 | 2348.782944 | 1323.383096 | -0.70365 | 4.37E-05   | 0.0063113  |
| RBMS2     | ENSG00000076067 | 1688.498776 | 948.0139723 | -0.70135 | 6.68E-05   | 0.0081259  |
| DPAGT1    | ENSG00000172269 | 920.2706279 | 520.455996  | -0.69905 | 4.95E-05   | 0.0068301  |
| SNX6      | ENSG00000129515 | 2583.829497 | 1490.701009 | -0.69707 | 9.84E-06   | 0.0019755  |
| FBXO33    | ENSG00000165355 | 661.8192412 | 367.7409573 | -0.69525 | 0.00017587 | 0.018324   |
| FLOT2     | ENSG00000132589 | 2737.389891 | 1535.239185 | -0.69367 | 0.00012228 | 0.013239   |
| SLC46A3   | ENSG00000139508 | 382.3168539 | 207.5432863 | -0.6881  | 0.00056788 | 0.043738   |
| IAH1      | ENSG00000134330 | 709.3395028 | 396.9403645 | -0.67567 | 0.00039323 | 0.032839   |
| SPDL1     | ENSG00000040275 | 1099.257056 | 616.8563758 | -0.67384 | 0.00038135 | 0.032824   |
| CTNNA1    | ENSG00000044115 | 10941.61988 | 6449.398745 | -0.67101 | 1.88E-05   | 0.0033787  |
| MTX1      | ENSG00000173171 | 586.2991084 | 325.413322  | -0.67081 | 0.00065092 | 0.047981   |
| SNTB2     | ENSG00000168807 | 1194.78818  | 696.8260584 | -0.66958 | 6.07E-05   | 0.0077921  |
| CREG1     | ENSG00000143162 | 1101.355984 | 621.0470484 | -0.66808 | 0.00043113 | 0.034939   |
| CCDC88C   | ENSG00000015133 | 1590.519959 | 939.2110539 | -0.66146 | 4.43E-05   | 0.0063258  |
| AMOTL2    | ENSG00000114019 | 5657.113863 | 3180.843311 | -0.66127 | 0.00066618 | 0.048846   |
| C1orf116  | ENSG00000182795 | 3128.288253 | 1797.691104 | -0.6596  | 0.00031669 | 0.028498   |
| SUCLG2    | ENSG00000172340 | 1351.894873 | 799.1100832 | -0.65589 | 6.98E-05   | 0.008336   |
| NDFIP2    | ENSG00000102471 | 2169.005365 | 1270.091697 | -0.65349 | 0.00017106 | 0.017959   |
| RUNDC1    | ENSG00000198863 | 1936.111927 | 1151.715018 | -0.64918 | 7.65E-05   | 0.008979   |
| FKBP1A    | ENSG00000088832 | 15838.28854 | 9457.73526  | -0.64693 | 6.78E-05   | 0.0081679  |
| MAP3K14   | ENSG0000006062  | 644.5633434 | 375.130774  | -0.64532 | 0.00042235 | 0.034429   |
| GINS1     | ENSG00000101003 | 1071.965183 | 632.1736466 | -0.64214 | 0.00025549 | 0.024418   |
| TRAM2     | ENSG00000065308 | 2765.251777 | 1666.650393 | -0.63996 | 5.67E-05   | 0.007488   |
| CHRNB1    | ENSG00000170175 | 838.1870168 | 499.9891503 | -0.63463 | 0.00022027 | 0.021876   |
| MYL12A    | ENSG00000101608 | 3638.301204 | 2132.950993 | -0.63443 | 0.00056155 | 0.043719   |
| NUAK1     | ENSG00000074590 | 596.4370221 | 353.0224162 | -0.63284 | 0.00039811 | 0.032839   |
| AJUBA     | ENSG00000129474 | 4234.997356 | 2515.261688 | -0.63019 | 0.00038581 | 0.032839   |
| PRMT5     | ENSG00000100462 | 1431.150571 | 867.8865445 | -0.62936 | 9.31E-05   | 0.010479   |
| EPHA2     | ENSG00000142627 | 11686.41105 | 6941.266886 | -0.62523 | 0.00052714 | 0.041272   |
| C19orf48  | ENSG00000167747 | 1806.059772 | 1082.005849 | -0.62407 | 0.00036006 | 0.03158    |
| MID1      | ENSG00000101871 | 1161.221646 | 714.9187618 | -0.60549 | 0.00023836 | 0.023099   |
| EIF4G1    | ENSG00000114867 | 18942.34361 | 11713.56185 | -0.60026 | 0.00026342 | 0.025003   |
| IRX2      | ENSG00000170561 | 2074.329889 | 1295.082575 | -0.59532 | 0.00018191 | 0.018813   |
| SLC22A5   | ENSG00000197375 | 943.5340466 | 592.1251406 | -0.57563 | 0.00067406 | 0.049135   |
| EFCAB14   | ENSG00000159658 | 2282.502277 | 1457.921177 | -0.5659  | 0.00038934 | 0.032839   |
| CALM2     | ENSG00000143933 | 6624.485897 | 4247.984775 | -0.56487 | 0.00029644 | 0.027027   |
| HIPK3     | ENSG00000110422 | 2857.231621 | 1850.425868 | -0.54741 | 0.00063889 | 0.047346   |
| NF2       | ENSG00000186575 | 3184.371473 | 2073.55204  | -0.54731 | 0.00038899 | 0.032839   |
| LUZP1     | ENSG00000169641 | 2485.64818  | 1615.243935 | -0.54656 | 0.00051727 | 0.040729   |
| MAP4K4    | ENSG00000071054 | 5176.689484 | 7814.019942 | 0.52605  | 0.00061493 | 0.046567   |
| VOPP1     | ENSG00000154978 | 2970.93683  | 4680.207331 | 0.56716  | 0.00057768 | 0.044229   |

|             |                 |             |             |         |            |            |
|-------------|-----------------|-------------|-------------|---------|------------|------------|
| MRFAP1      | ENSG00000179010 | 2749.515247 | 4318.909186 | 0.57206 | 0.00028828 | 0.026633   |
| WNT9A       | ENSG00000143816 | 2047.038838 | 3253.850919 | 0.58674 | 0.00020568 | 0.020654   |
| HOXA9       | ENSG00000078399 | 710.7042139 | 1149.623205 | 0.58842 | 0.00069008 | 0.049808   |
| FOPNL       | ENSG00000133393 | 966.1948845 | 1564.565071 | 0.59998 | 0.000304   | 0.027534   |
| XDH         | ENSG00000158125 | 3141.424372 | 5035.663839 | 0.60023 | 0.00011672 | 0.012736   |
| HSDL2       | ENSG00000119471 | 1102.940937 | 1804.556919 | 0.60308 | 0.000484   | 0.038548   |
| NSF         | ENSG00000073969 | 643.5108139 | 1053.66495  | 0.60652 | 0.00039625 | 0.032839   |
| C9orf78     | ENSG00000136819 | 665.7444886 | 1088.864606 | 0.60933 | 0.00029194 | 0.026792   |
| CD164       | ENSG00000135535 | 3264.388211 | 5312.982032 | 0.61272 | 0.00014438 | 0.015391   |
| RP11-421F16 | ENSG00000247903 | 248.5982877 | 419.4735156 | 0.62472 | 0.00060618 | 0.046156   |
| FYB         | ENSG00000082074 | 842.0624182 | 1410.127    | 0.62504 | 0.00040692 | 0.033368   |
| PWWP2A      | ENSG00000170234 | 319.1812678 | 534.4137615 | 0.62684 | 0.00035623 | 0.031444   |
| HKR1        | ENSG00000181666 | 267.0905663 | 460.1212549 | 0.63958 | 0.00062507 | 0.046634   |
| GOLGA2      | ENSG00000167110 | 2088.048233 | 3516.325203 | 0.65875 | 3.41E-05   | 0.0051881  |
| GRHL1       | ENSG00000134317 | 923.0223891 | 1567.661205 | 0.6605  | 6.43E-05   | 0.0080971  |
| PDIK1L      | ENSG00000175087 | 235.2182165 | 411.9388254 | 0.66255 | 0.00036335 | 0.031669   |
| ZNF138      | ENSG00000197008 | 203.8587993 | 362.4906076 | 0.66478 | 0.0005681  | 0.043738   |
| SETD7       | ENSG00000145391 | 1419.568948 | 2500.604733 | 0.68031 | 0.00015728 | 0.016638   |
| MESDC2      | ENSG00000117899 | 903.1676212 | 1570.604976 | 0.68694 | 3.92E-05   | 0.0057131  |
| ANXA7       | ENSG00000138279 | 1787.193782 | 3147.268023 | 0.6917  | 6.65E-05   | 0.0081259  |
| PCNXL3      | ENSG00000197136 | 1882.802221 | 3280.08964  | 0.69222 | 2.76E-05   | 0.0045512  |
| PFKL        | ENSG00000141959 | 1544.028505 | 2698.735471 | 0.69302 | 3.38E-05   | 0.0051881  |
| HS2ST1      | ENSG00000153936 | 699.9723567 | 1239.558229 | 0.69877 | 5.57E-05   | 0.0074212  |
| MEX3D       | ENSG00000181588 | 478.6502793 | 878.1928465 | 0.7081  | 0.0001878  | 0.019244   |
| TMEM45B     | ENSG00000151715 | 974.1644949 | 1793.196538 | 0.71542 | 0.00014292 | 0.015354   |
| SERPINE2    | ENSG00000135919 | 632.2919681 | 1200.935846 | 0.71902 | 0.00034238 | 0.030611   |
| ABCA1       | ENSG00000165029 | 1569.316451 | 2899.23041  | 0.73265 | 5.86E-05   | 0.0076546  |
| NDUFS2      | ENSG00000158864 | 1455.636428 | 2612.816894 | 0.73279 | 7.01E-06   | 0.0014293  |
| FNBP1       | ENSG00000187239 | 757.9271656 | 1391.872434 | 0.73573 | 3.36E-05   | 0.0051881  |
| CHST14      | ENSG00000169105 | 132.297708  | 257.6909876 | 0.73747 | 0.00028684 | 0.026633   |
| ZNF845      | ENSG00000213799 | 238.836275  | 493.7279773 | 0.74684 | 0.00062013 | 0.046634   |
| ZNF761      | ENSG00000160336 | 217.7525982 | 441.9645257 | 0.74696 | 0.00047717 | 0.038445   |
| TOMM22      | ENSG00000100216 | 660.2880964 | 1213.703957 | 0.74755 | 1.32E-05   | 0.0024781  |
| SDC4        | ENSG00000124145 | 8088.585283 | 14536.5261  | 0.74875 | 1.11E-06   | 0.00027844 |
| CCDC71L     | ENSG00000253276 | 599.5100111 | 1194.924835 | 0.76217 | 0.00018885 | 0.019244   |
| LPCAT1      | ENSG00000153395 | 5676.003294 | 10613.60209 | 0.76448 | 1.09E-05   | 0.0020909  |
| ANXA4       | ENSG00000196975 | 725.7208088 | 1403.565219 | 0.76458 | 6.53E-05   | 0.0081259  |
| LMTK3       | ENSG00000142235 | 158.4554472 | 306.8984742 | 0.76844 | 5.48E-05   | 0.0073793  |
| DCP2        | ENSG00000172795 | 714.749487  | 1382.916057 | 0.7749  | 3.73E-05   | 0.0054982  |
| GXYLT1      | ENSG00000151233 | 410.6488996 | 807.8181955 | 0.77994 | 5.43E-05   | 0.0073793  |
| ZW10        | ENSG00000086827 | 578.792248  | 1113.979993 | 0.79546 | 6.26E-06   | 0.001294   |
| DHRS9       | ENSG00000073737 | 66.290414   | 158.8444215 | 0.8036  | 0.00051588 | 0.040729   |
| THBD        | ENSG00000178726 | 166.7800091 | 348.8518753 | 0.80441 | 0.00010191 | 0.011298   |
| S100A7      | ENSG00000143556 | 13.18333837 | 69.81747195 | 0.80884 | 0.00048169 | 0.038548   |
| CDK14       | ENSG00000058091 | 173.3325405 | 347.0696116 | 0.81654 | 1.25E-05   | 0.002376   |
| MKMK2       | ENSG00000099875 | 4856.943416 | 9460.542765 | 0.83653 | 2.57E-07   | 8.08E-05   |
| NOLC1       | ENSG00000166197 | 2061.634734 | 4101.493688 | 0.8458  | 7.71E-07   | 0.00020534 |
| TM4SF1      | ENSG00000169908 | 1302.272775 | 2588.840621 | 0.86756 | 5.17E-08   | 2.05E-05   |
| ATP8A1      | ENSG00000124406 | 116.3852586 | 276.431067  | 0.87205 | 7.91E-05   | 0.0092172  |
| HDAC1       | ENSG00000116478 | 3194.430885 | 6415.516189 | 0.87221 | 1.00E-07   | 3.65E-05   |
| ABCA12      | ENSG00000144452 | 334.0402664 | 697.1369725 | 0.87355 | 2.02E-06   | 0.00049178 |
| HEPHL1      | ENSG00000181333 | 237.3499601 | 562.324383  | 0.87695 | 6.63E-05   | 0.0081259  |
| CASP14      | ENSG00000105141 | 112.5875935 | 328.1158897 | 0.88027 | 0.00022251 | 0.021876   |
| HABP4       | ENSG00000130956 | 178.8475531 | 404.5632498 | 0.88725 | 1.92E-05   | 0.0033816  |
| LRG1        | ENSG00000171236 | 159.4565921 | 417.2978057 | 0.93247 | 3.67E-05   | 0.0054727  |
| SOD2        | ENSG00000112096 | 3050.728192 | 6944.517054 | 0.93248 | 2.41E-06   | 0.00056518 |

|          |                 |             |             |         |          |            |
|----------|-----------------|-------------|-------------|---------|----------|------------|
| PALM3    | ENSG00000187867 | 28.94070856 | 97.31592187 | 0.9446  | 8.24E-05 | 0.00952    |
| MUC1     | ENSG00000185499 | 145.0088505 | 380.8205886 | 0.95475 | 1.93E-05 | 0.0033816  |
| G3BP2    | ENSG00000138757 | 3147.838492 | 6722.309588 | 0.96929 | 2.75E-10 | 2.12E-07   |
| P2RY6    | ENSG00000171631 | 106.7817667 | 305.1592693 | 0.9722  | 2.50E-05 | 0.0041683  |
| CASP7    | ENSG00000165806 | 626.4901087 | 1412.728383 | 0.99381 | 1.02E-08 | 4.55E-06   |
| IFI16    | ENSG00000163565 | 1430.071557 | 3299.801385 | 1.0088  | 1.57E-08 | 6.80E-06   |
| STX12    | ENSG00000117758 | 458.3081019 | 1036.941766 | 1.0107  | 1.90E-09 | 1.10E-06   |
| RGS19    | ENSG00000171700 | 278.763088  | 665.6289053 | 1.0316  | 2.21E-08 | 9.28E-06   |
| PRDX4    | ENSG00000123131 | 783.7292984 | 1942.279154 | 1.102   | 3.70E-10 | 2.56E-07   |
| CCL20    | ENSG00000115009 | 17.58475268 | 89.40872663 | 1.1204  | 3.40E-06 | 0.00073512 |
| ZNF267   | ENSG00000185947 | 308.6743434 | 959.7571502 | 1.1874  | 3.27E-08 | 1.33E-05   |
| OGFR     | ENSG00000060491 | 1694.086754 | 4708.921043 | 1.1951  | 2.51E-10 | 2.05E-07   |
| C1S      | ENSG00000182326 | 62.40647997 | 218.7609166 | 1.2693  | 7.38E-09 | 3.53E-06   |
| ZNF616   | ENSG00000204611 | 102.3344915 | 337.3804821 | 1.3172  | 1.05E-10 | 1.04E-07   |
| PTGS2    | ENSG00000073756 | 228.7270824 | 937.94387   | 1.3306  | 6.03E-09 | 2.98E-06   |
| GANAB    | ENSG00000089597 | 4540.059957 | 14252.18485 | 1.3584  | 1.49E-13 | 2.57E-10   |
| HPGD     | ENSG00000164120 | 21.44976765 | 125.3352346 | 1.4619  | 6.99E-10 | 4.21E-07   |
| CSF3     | ENSG00000108342 | 6.159343102 | 70.11864609 | 1.4879  | 6.56E-10 | 4.13E-07   |
| SERPINB3 | ENSG00000057149 | 14.87395059 | 123.8406172 | 1.5023  | 4.51E-10 | 2.98E-07   |
| TPM4     | ENSG00000167460 | 4685.919224 | 16182.57284 | 1.5191  | 1.17E-18 | 3.23E-15   |
| S100A8   | ENSG00000143546 | 41.62701274 | 294.1322487 | 1.5278  | 1.74E-10 | 1.51E-07   |
| MMP1     | ENSG00000196611 | 39.05823112 | 218.5109818 | 1.538   | 3.94E-11 | 4.20E-08   |
| SERPINB4 | ENSG00000206073 | 23.90762694 | 238.547684  | 1.6325  | 1.23E-11 | 1.56E-08   |
| S100A9   | ENSG00000163220 | 279.4548398 | 1433.911974 | 1.8068  | 6.23E-19 | 2.88E-15   |
| CYP1B1   | ENSG00000138061 | 55.79004826 | 380.3175352 | 1.9349  | 1.12E-18 | 3.23E-15   |
